# Supplementary material
Source: PubMed Central journal article supplement (PMC3733111)
Supplement: NIHMS495072-supplement-2.pdf [file NIHMS495072-supplement-2.pdf]

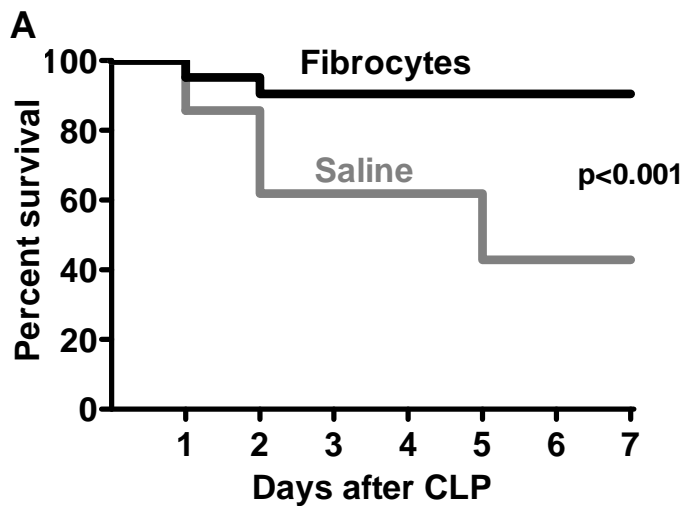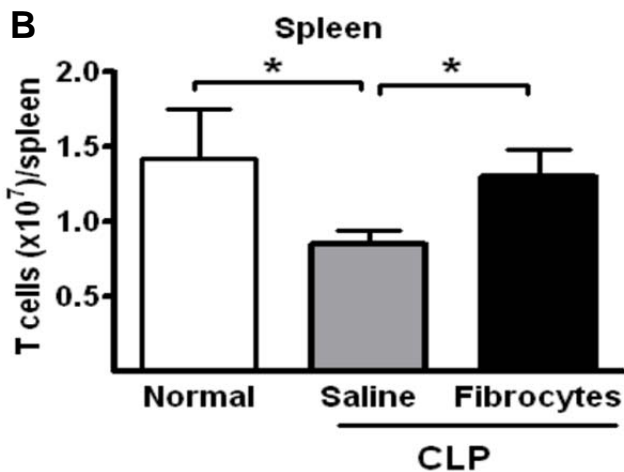

**Supplemental Digital Content 2: Fibrocytes increase survival and splenic T cell counts of outbred mice after CLP.** Female, ICR mice were anesthetized and CLP was performed with a 21g double puncture. At the time of closure,  $1 \times 10^6 / 200\mu\text{l}$  fibrocytes or an equal volume of saline were deposited in the abdomen. A) Mice ( $n=20/\text{group}$ , 4 independent experiments) were observed for seven days after surgery and the results were plotted on a Kaplan Meier Survival Curve,  $p < 0.001$ . B) The experiment was repeated and animals ( $n = 10-12/\text{group}$ ) were euthanized at 48 hours after CLP. Spleens were harvested and processed to yield single cell suspensions. The spleens of unmanipulated mice were processed for comparison. T cells were separated by negative isolation using magnetic beads (Dynabeads®, Invitrogen, Grand Island, NY). Total viable cells were counted on a hemacytometer and mean results are reported  $\pm$  SEM. \* =  $p < 0.05$ .
